# Supplementary material for: Photocapacitors integrating Binder-Free MXene Microsupercapacitor and Carbon Perovskite Solar Cell for Indoor Applications
Source: Research Square preprint supplement (doi:10.21203/rs.3.rs-8680958/v1), 2026-02-11
Supplement: Supplementary file 1 [file c8cad6db4c6bf3e3af262722.docx]

**Electronic Supplementary Information**

**Photocapacitors Integrating Binder-Free MXene Microsupercapacitor and Carbon Perovskite Solar Cell for Indoor Applications**

*Abhinandan Patra1$, Samyuktha Noola1,2$, Giulio Koch1, Ebin Joseph1, Thomas Meredith Brown1, Francesca De Rossi1, Claudia Barolo2, Chandra Sekhar Rout3,* Francesca Brunetti1,**

*1C.H.O.S.E. (Centre for Hybrid and Organic Solar Energy), Department of Electronic Engineering, University of Rome Tor Vergata, via del Politecnico 1, 00133, Rome, Italy.*

*2 Department of Chemistry, NIS Interdepartmental Centre and INSTM Reference Centre, Università Degli Studì di Torino, Via Pietro Giuria 7, 10125, Torino, Italy.*

*3Centre for Nano and Material Sciences, Jain (Deemed–to–be University), Jain Global Campus, Kanakapura Road, Bangalore – 562112, Karnataka, India*

*$ The authors have contributed equally.*

*Corresponding authors:* [*francesca.brunetti@uniroma2.it*](mailto:francesca.brunetti@uniroma2.it)*,* [*r.chandrasekhar@jainuniversity.ac.in*](mailto:r.chandrasekhar@jainuniversity.ac.in)

**Figure S1**: Exposed area for EDS along with elemental mapping of Ti and C.

**Figure S2**: XPS survey spectra of exfoliated Ti3C2Tx MXene.

**Figure S3**: PV parameters of C-PSCs in forward and reverse scan directions; (a) open-circuit voltage (VOC) (b) short-circuit current density (JSC); (c) fill factor (FF); (d) power conversion efficiency (PCE).

| Scan | Voc(V) | Jsc(mA/cm2) | Fill factor (%) | PCE (%) |
| --- | --- | --- | --- | --- |
| FW | 0.99 ± 0.02 | 16.16 ± 2.3 | 32.5 ± 4.6 | 5.23 ± 1.1 |
| RV | 0.98 ± 0.02 | 16.17 ± 2.4 | 32.43 ± 8.1 | 5.21 ± 1.5 |

**Table S1**: Average values of PV parameters of C-PSCs in forward and reverse scan directions.

**Figure S4**: (a) Dark JV and (b) Current vs light Intensity for the best performing C-PSC device.

**Figure S5**: (a) Comparative GCD of the integrated photocapacitor under various light intensities, i.e. 1 sun, 1000 lx, 500 lx, 200 lx; (b) Power variation with time of the device under various light conditions, (c) GCD of the device under 1 sun and constant current mode; (d), (e) and (f) Power variation of the integrated photocapacitor under different indoor light conditions, i.e. 1000 lx, 500 lx, 200 lx, respectively.

**Figure S6**: Diagram illustrating the synthesis process for Ti3C2Tx MXenes exfoliation.

**Figure S7**: (a) MXene inks of different concentrations and (b) all blade coated MXene/ITO/glass in a 10 × 8 cm2 of large area.

| Light intensities  (Outdoor and indoor) | Load Resistances | | | | | | | | | | | | |
| --- | --- | --- | --- | --- | --- | --- | --- | --- | --- | --- | --- | --- | --- |
| **1 MΩ** | | | | **3 MΩ** | | | | **6 MΩ** | | | | |
| **Vcap**  **(V)** | **Pcap (µW)** | **tc**  **(s)** | **td**  **(s)** | **Vcap**  **(V)** | **Pcap (µW)** | **tc**  **(s)** | **td**  **(s)** | **Vcap**  **(V)** | **Pcap (µW)** | **tc**  **(s)** | **td**  **(s)** |
| **1 sun** | 0.85 | 0.75 | 5.1 | ≈67 | 0.86 | 0.25 | 5 | ≈68 | 0.87 | 0.13 | 4.9 | ≈70 |
| **1000 lx** | 0.78 | 0.63 | 5.1 | ≈65 | 0.79 | 0.21 | 5 | ≈67 | 0.8 | 0.10 | 4.9 | ≈68 |
| **500 lx** | 0.76 | 0.60 | 5.1 | ≈62 | 0.77 | 0.20 | 5 | ≈65 | 0.78 | 0.09 | 4.9 | ≈66 |
| **200 lx** | 0.72 | 0.54 | 5.1 | ≈60 | 0.73 | 0.18 | 5 | ≈63 | 0.74 | 0.09 | 4.9 | ≈64 |

**Table S2**: All the information regarding photocharging, discharging time, voltage and power acquired at various light intensities and resistances.

| Supercapacitor electrode | Device  layout | Type of PV device | Operational voltage  (Vcap) | ηoverall (%)  (illumination) | Mode of measurement | Stability | Coulombic efficiency  (%) | Ref |
| --- | --- | --- | --- | --- | --- | --- | --- | --- |
| MWCNT-PPy | 3T | Glass/FTO/TiO2/MAPbI3/  Spiro-OMeTAD/gold | 0.6 in 300 s | 10 (1 sun) | Constant current mode | - | - | 1 |
| carbon-AC/rGO-PEDOT  (Microsupercapacitor) | 2T | Glass/FTO/SnO2/MAPbI3/  carbon-AC/rGO-PEDOT | 0.85 in 20 s | 3.6 (1 sun) | Constant current mode | 51.6% after 6000 cycles | - | 2 |
| PEDOT-C | 2T | Perovskite solar cell | 0.96 in 10 s | 5.6 (1 sun) | Constant current mode | 100% after 460 cycles | - | 3 |
| PANI@CNT  (Sandwiched type) | 3T | Glass/FTO/TiO2/MAPbI3-  MWCNT/PANI@CNT/PMMA | 0.7 in 100 s | 0.76 (1 sun) | Constant current mode | 70% after 500 cycles | 96 | 4 |
| Activated carbon (sandwiched type) | 3T | Glass/FTO/WOx/MAPbI3/  Spiro-OMeTAD/Au | 0.65 in 25 s | 2.13 (1 sun) | Constant current mode | 85% after 2000 cycles | - | 1 |
| Carbon (sandwiched type) | 3T | Glass/FTO/c-TiO2/  m-TiO2/MAPbI3/Carbon | 0.91 in 10 s | 7.1% (1 sun) | Constant current mode | 85% after 3000 cycles | - | 6 |
| MoO3  (Sandwiched type) | 3T | Glass/FTO/TiO2/MAPbI3− xCl x/  spiro-OMeTAD/MoO3/Au | 0.6 in 100 s | 2.3% (1 sun) | Constant current mode | - | - | 7 |
| MXene  (Sandwiched type) | 2T | PET/Ti3C2T*x*/PEI/P3HT:ICBA/PEDOT:PSS/Ti3C2T*x* | 0.8 V in 50 s | 2.2% (1 sun) | Constant current mode | 95% after 10000 cycles | 97% after 10000 cycles | 8 |
| **MXene**  **(Microsupercapacitor)** | **3T** | **Glass/ITO/SnO2/**  **Cs0.06FA0.78MA0.16Pb(I0.84Br0.16)3/PTAA/C** | **1.15 in 4.9 s** | **8.5% (1 sun)** | **Constant current mode** | **87% after 6000 cycles** | **99** | **This Work** |
| **MXene**  **(Microsupercapacitor)** | **3T** | **Glass/ITO/SnO2/**  **Cs0.06FA0.78MA0.16Pb(I0.84Br0.16)3/PTAA/C** | **0.87 in 4.9 s** | **3.8% (1 sun)**  **8.05 (1000 lx)** | **Open circuit voltage** | **87% after 6000 cycles** | **99** | **This Work** |

**Table S3**: Comparative analysis of photocapacitors combining supercapacitors with different layouts and electrode materials and perovskite solar cells with different cell stacks.

**References**

1. Xu, X. *et al.* A Power Pack Based on Organometallic Perovskite Solar Cell and Supercapacitor. *ACS Nano* **9**, 1782–1787 (2015).

2. Sun, J. *et al.* Laser-Assisted Fabrication of Microphotocapacitors with High Energy Density and Output Voltage. *ACS Appl. Mater. Interfaces* **13**, 419–428 (2021).

3. Gao, K., Ti, D. & Zhang, Z. A photocapacitor with high working voltage and energy density. *Sustainable Energy Fuels* **3**, 1937–1942 (2019).

4. Liu, R., Liu, C. & Fan, S. A photocapacitor based on organometal halide perovskite and PANI/CNT composites integrated using a CNT bridge. *J. Mater. Chem. A* **5**, 23078–23084 (2017).

5. Yang, Y. *et al.* Self-charging flexible solar capacitors based on integrated perovskite solar cells and quasi-solid-state supercapacitors fabricated at low temperature. *Journal of Power Sources* **479**, 229046 (2020).

6. Liang, J. *et al.* Integrated perovskite solar capacitors with high energy conversion efficiency and fast photo-charging rate. *J. Mater. Chem. A* **6**, 2047–2052 (2018).

7. Zhou, F. *et al.* Perovskite Photovoltachromic Supercapacitor with All-Transparent Electrodes. *ACS Nano* **10**, 5900–5908 (2016)

8. Qin, L. *et al.* A flexible semitransparent photovoltaic supercapacitor based on water-processed MXene electrodes. *Journal of Materials Chemistry A* **8**, 5467–5475 (2020).
